# Supplementary material for: Twelve new species of Dipara Walker, 1833 (Hymenoptera, Chalcidoidea, Pteromalidae, Diparinae) from Kenya, with a key to the Afrotropical species
Source: Zookeys. 2021 Oct 29;1067:101–57. doi: 10.3897/zookeys.1067.72395 (PMC8571251; doi:10.3897/zookeys.1067.72395)
Supplement: Supplementary material 3 — Table S3 [file zookeys-1067-101-s003.xlsx]

## Sheet: Tabelle1
Species	ID	hea.b/mss.b	hea.b/hea.h	ant.eye/tor.d	ant.d/tor.d	msp.l/eye.h	pol/ool	prn.b/prn.l	ptl.l/ptl.b	gst.l/mss.l
D. andreabalzerae	ZFMK-HYM-00037130	1.55718	1.30629	0.445439	0.905389	0.326296	0.71639	2.019	1.29158	1.5555
D. andreabalzerae	ZFMK-HYM-00037131	1.5895	1.25718	N	N	0.325839	0.653652	2.13538	1.25389	1.40948
D. andreabalzerae	ZFMK-HYM-00037132	1.56786	1.26677	0.529667	0.842556	0.294699	0.621319	2.03573	1.32396	1.48087
D. andreabalzerae	ZFMK-HYM-00037133	1.52599	1.26224	0.756751	0.979396	0.29801	0.739399	1.99349	1.34052	1.48962
D. andreabalzerae	ZFMK-HYM-00037134	1.5652	1.31478	0.567012	1.06919	0.352798	0.697406	2.12618	1.43845	1.23391
D. corona	ZFMK-HYM-00040381	1.12241	1.33139	0.485753	1.31427	0.33252	1.31126	3.01168	1.20248	1.07235
D. fastigata	ZFMK-HYM-00040382	1.63756	1.25197	1.11715	1.4775	0.333954	0.850671	1.92617	1.60265	1.3126
D. kakamegensis	ZFMK-HYM-00037140	1.36461	1.62929	0.682956	1.3141	0.295333	1.38384	3.37469	1.15251	1.46869
D. kakamegensis	ZFMK-HYM-00037141	1.38802	1.32481	0.813424	1.18813	0.34641	1.29867	2.84995	1.285	1.46872
D. kakamegensis	ZFMK-HYM-00037142	1.45328	1.25026	0.97037	1.14728	0.365281	1.20839	3.22135	1.2191	1.4138
D. kakamegensis	ZFMK-HYM-00037143	1.24342	1.27836	0.840938	1.18555	0.308975	1.28284	3.95221	1.72048	1.20548
D. kakamegensis	ZFMK-HYM-00037144	1.34022	1.26882	0.959909	1.27121	0.325546	1.40553	3.4857	1.64107	1.31698
D. lux	ZFMK-HYM-00040379	1.16084	1.3368	0.550655	1.13421	0.343761	0.997432	3.36776	2.49706	1.34266
D. lux	ZFMK-HYM-00040380	1.19061	1.31244	0.525804	1.24242	0.38285	0.919547	3.28403	2.61295	1.37253
D. nigroscutellata	ZFMK-HYM-00037253	1.64753	1.2116	0	1.03888	0.400643	0.601751	1.47539	1.06125	1.58845
D. nigroscutellata	ZFMK-HYM-00037254	1.64341	1.2298	0	1.19086	0.402344	0.943169	1.53594	1.02163	1.74925
D. nigroscutellata	ZFMK-HYM-00037255	1.68057	1.18789	0	1.06718	0.39871	0.862065	1.64089	0.979455	1.53131
D. nigroscutellata	ZFMK-HYM-00037256	1.71453	1.2195	0	1.02537	0.382106	0.782159	1.61229	1.16308	1.60621
D. nigroscutellata	ZFMK-HYM-00040257	1.67717	1.25887	0	1.07168	0.367349	0.657192	1.64858	1.06991	1.60547
D. nyani	ZFMK-HYM-00037248	1.22611	1.30496	0.942648	1.28256	0.325784	1.38273	5.78537	2.01871	1.25489
D. nyani	ZFMK-HYM-00037249	1.32809	1.26791	0.732099	1.26606	0.332072	1.40965	3.91824	1.77602	1.22221
D. nyani	ZFMK-HYM-00037250	1.24362	1.25217	0.858423	1.18173	0.37429	1.24174	3.84044	2.05367	1.29479
D. nyani	ZFMK-HYM-00037251	1.15996	1.27225	0.642528	1.21221	0.361607	1.37354	4.50383	N	1.20449
D. nyani	ZFMK-HYM-00037252	1.22707	1.26155	0.512007	1.119	0.386327	1.33312	4.29966	2.00362	1.22265
D. reticulata	ZFMK-HYM-00040373	1.53442	1.35344	1.34334	1.31399	0.272392	0.932442	1.78305	1.24091	1.54267
D. reticulata	ZFMK-HYM-00040374	1.47609	1.42419	1.30483	1.57986	0.257784	1.11807	1.84411	1.23145	1.56029
D. reticulata	ZFMK-HYM-00040375	1.60034	1.39726	1.56481	1.58023	0.286501	1.09125	2.37865	1.30876	1.46566
D. reticulata	ZFMK-HYM-00040376	1.52931	1.41195	1.29426	1.46628	0.256457	1.07283	2.10594	1.20167	1.55323
D. rodneymulleni	ZFMK-HYM-00040370	1.26123	N	N	N	0.317232	1.52643	3.28958	2.72184	1.52814
D. rodneymulleni	ZFMK-HYM-00040371	1.27833	1.22428	1.48775	1.01019	0.322943	1.46891	3.77374	2.79562	1.46222
D. rodneymulleni	ZFMK-HYM-00040372	N	1.2321	1.75567	1.03816	0.307878	1.50246	3.80914	2.53175	1.52769
D. rodneymulleni	ZFMK-HYM-00040369	1.24864	1.28815	1.68355	0.99025	0.303589	1.73765	3.73916	2.7854	1.534
D. sapphirus	ZFMK-HYM-00040339	1.14072	1.27492	0.998183	1.16136	0.264838	0.951209	3.59901	1.59876	1.46581
D. sapphirus	ZFMK-HYM-00040340	1.18932	1.25539	1.0809	1.26019	0.353079	0.886779	4.96212	1.31451	1.53134
D. sapphirus	ZFMK-HYM-00040341	1.12625	1.29902	0.846673	1.07371	0.286026	0.781712	3.51343	1.53992	1.38575
D. sapphirus	ZFMK-HYM-00040342	1.15427	1.25615	0.898644	1.21265	0.41285	0.89065	3.35188	1.66876	1.43826
D. sapphirus	ZFMK-HYM-00040343	1.21861	1.29037	0.989241	1.13432	0.319495	0.870527	3.29678	1.51158	1.36624
D. tenebra	ZFMK-HYM-00040377	1.15288	1.32587	0.66323	1.17378	0.367115	0.893428	3.11988	2.51203	1.20476
D. tenebra	ZFMK-HYM-00040378	1.18447	1.37001	0.758637	1.31746	0.394242	0.95504	3.11085	2.77112	1.23572
D. tigrina	ZFMK-HYM-00040383	1.45642	1.23815	0.656361	1.30509	0.342067	1.02721	1.94545	1.36626	1.51073
